# Supplementary material
Source: PubMed Central journal article supplement (PMC3368992)

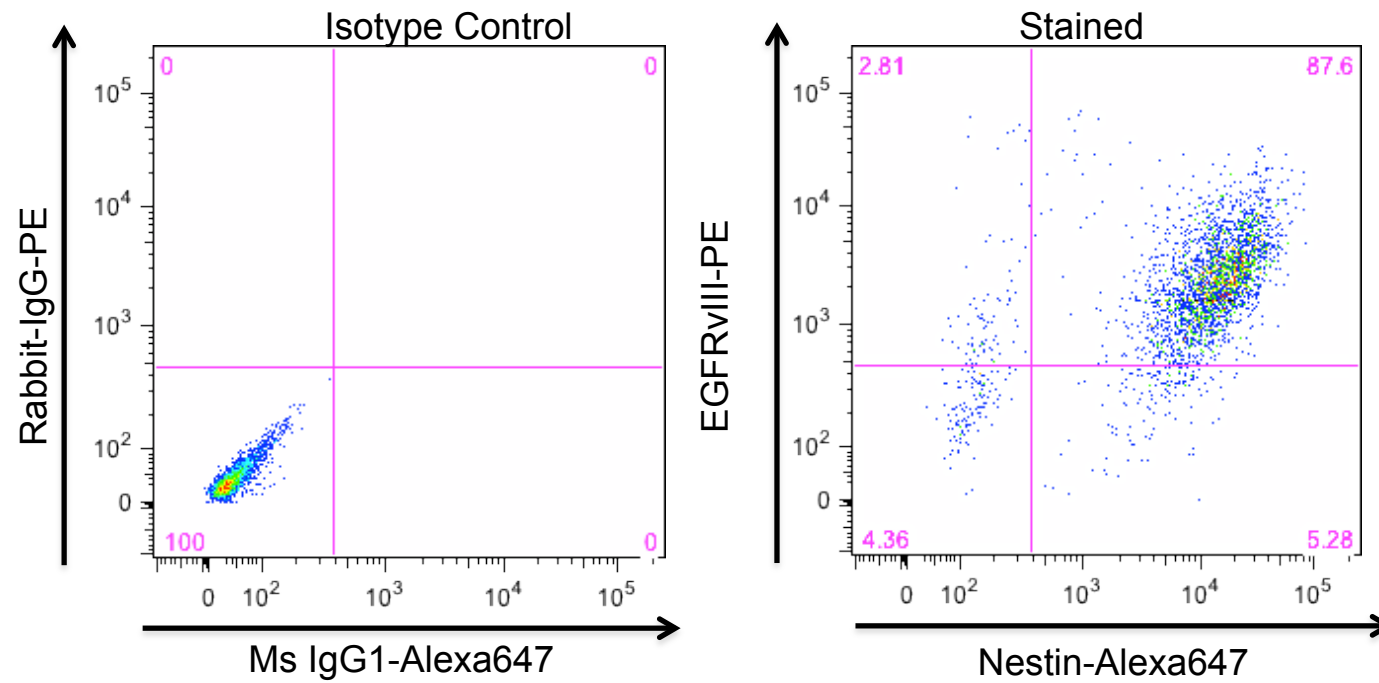

Supplemental Figure 1

Supplement: NIHMS377247-supplement-Supplemental_Information.pdf [file NIHMS377247-supplement-Supplemental_Information.pdf]
